# Supplementary material
Source: PubMed Central journal article supplement (PMC8222072)
Supplement: NIHMS1708673-supplement-1.pdf [file NIHMS1708673-supplement-1.pdf]

## **Electronic Supplementary Material**

**Article:** Prospective Associations between Sport Participation and Indices of Mental Health across Adolescence

**Journal:** Journal of Youth and Adolescence

**Authors:** Scott Graupensperger, Jordan Sutcliffe, and Stewart Vella.

---

**Table S1.**

Confirmatory Factor Analysis for the Strengths and Difficulties Questionnaire at Time 1 (5-factor).

| <b>Item</b>                                             | $\lambda$ | <i>SE</i> | $R^2$ |
|---------------------------------------------------------|-----------|-----------|-------|
| <b>Emotional Problems</b>                               |           |           |       |
| 1. I get a lot of headaches                             | 0.96      | 0.02      | 0.91  |
| 2. I worry a lot                                        | 0.95      | 0.02      | 0.91  |
| 3. I am often unhappy                                   | 0.98      | 0.02      | 0.95  |
| 4. I am nervous in new situations                       | 0.95      | 0.02      | 0.91  |
| 5. I have many fears                                    | 0.96      | 0.02      | 0.92  |
| <b>Conduct Problems</b>                                 |           |           |       |
| 6. I get very angry                                     | 0.96      | 0.02      | 0.91  |
| 7. I usually do as I am told ( <i>rs</i> )              | 0.96      | 0.02      | 0.92  |
| 8. I fight a lot                                        | 0.99      | 0.02      | 0.97  |
| 9. I am often accused of lying or cheating              | 0.96      | 0.02      | 0.92  |
| 10. I take things that are not mine                     | 0.99      | 0.02      | 0.97  |
| <b>Hyperactivity</b>                                    |           |           |       |
| 11. I am restless                                       | 0.96      | 0.02      | 0.92  |
| 12. I am constantly fidgeting                           | 0.96      | 0.02      | 0.92  |
| 13. I am easily distracted                              | 0.96      | 0.02      | 0.92  |
| 14. I think before I do things ( <i>rs</i> )            | 0.96      | 0.02      | 0.93  |
| 15. I finish the work I am doing ( <i>rs</i> )          | 0.96      | 0.02      | 0.92  |
| <b>Peer Problems</b>                                    |           |           |       |
| 16. I am usually on my own                              | 0.97      | 0.02      | 0.93  |
| 17. I have one good friend or more ( <i>rs</i> )        | 0.98      | 0.02      | 0.96  |
| 18. Other people my age generally like me ( <i>rs</i> ) | 0.96      | 0.02      | 0.92  |
| 19. Other children or young people pick on me           | 0.97      | 0.02      | 0.94  |
| 20. I get on better with adults than with people my age | 0.96      | 0.02      | 0.92  |
| <b>Prosocial</b>                                        |           |           |       |
| 21. I try to be nice to other people                    | 0.98      | 0.02      | 0.97  |
| 22. I usually share with others                         | 0.96      | 0.02      | 0.92  |
| 23. I am helpful if someone is hurt                     | 0.98      | 0.02      | 0.96  |
| 24. I am kind to younger children                       | 0.98      | 0.02      | 0.96  |
| 25. I often volunteer to help others                    | 0.96      | 0.02      | 0.92  |

**Note.**  $\lambda$  = standardized factor loading; *SE* = standard error estimate. All factor loadings are significant at  $p < .001$ . RMSEA = .07, CFI = .98, TLI = .98, SRMR = .01.

**Table S2.**

Parameter estimates obtained from random intercept cross-lagged panel models examining prospective associations between team sport participation and mental health indices.

|                                                           | <u>Depressive<br/>Symptoms</u><br><i>B (SE)</i> | <u>Anxiety<br/>Symptoms</u><br><i>B (SE)</i> | <u>Emotional<br/>symptoms</u><br><i>B (SE)</i> | <u>Hyperactivity<br/>Symptoms</u><br><i>B (SE)</i> | <u>Conduct<br/>Problems</u><br><i>B (SE)</i> | <u>Peer Problems</u><br><i>B (SE)</i> | <u>Prosocial<br/>Behavior</u><br><i>B (SE)</i> |
|-----------------------------------------------------------|-------------------------------------------------|----------------------------------------------|------------------------------------------------|----------------------------------------------------|----------------------------------------------|---------------------------------------|------------------------------------------------|
| <b>Between-Person Effects</b>                             |                                                 |                                              |                                                |                                                    |                                              |                                       |                                                |
| (BP) Team Sport ↔ MH Index                                | -.58 (.16)***                                   | -.08 (.02)***                                | -.35 (.07)***                                  | -.13 (.05)**                                       | -.15 (.05)***                                | -.36 (.05)***                         | .10 (.05)**                                    |
| <b>Prospective Within-Person Effects</b>                  |                                                 |                                              |                                                |                                                    |                                              |                                       |                                                |
| (AR1) Team Sport → Team Sport                             | .10 (.04)**                                     | .10 (.04)**                                  | .11 (.04)**                                    | .11 (.04)**                                        | .10 (.04)**                                  | .11 (.04)**                           | .09 (.04)*                                     |
| (AR2) MH Index → MH Index                                 | .19 (.04)***                                    | .48 (.04)***                                 | .49 (.03)***                                   | .33 (.03)***                                       | .24 (.05)***                                 | .27 (.04)***                          | .26 (.03)***                                   |
| (CL1) Team Sport → MH Index                               | -.29 (.11)**                                    | -.02 (.00)*                                  | -.08 (.03)**                                   | .03 (.02)                                          | .04 (.02)                                    | -.02 (.03)                            | -.02 (.03)                                     |
| (CL2) MH Index → Team Sport                               | -.01 (.01)                                      | -.14 (.07)                                   | -.05 (.02)**                                   | .03 (.03)                                          | .01 (.04)                                    | -.03 (.03)                            | .02 (.03)                                      |
| <b>Contemporaneous Within-Person Covariance Estimates</b> |                                                 |                                              |                                                |                                                    |                                              |                                       |                                                |
| (CV1) Team Sport ↔ MH Index                               | -.28 (.15)*                                     | -.04 (.02)**                                 | -.16 (.07)*                                    | -.04 (.07)                                         | -.02 (.04)                                   | .00 (.04)                             | .01 (.05)                                      |
| (CV2) Team Sport ↔ MH Index                               | -.16 (.25)                                      | -.03 (.02)                                   | -.23 (.08)**                                   | .02 (.07)                                          | .01 (.06)                                    | -.09 (.07)                            | -.04 (.07)                                     |
| (CV3) Team Sport ↔ MH Index                               | -.17 (.21)                                      | -.03 (.01)*                                  | -.10 (.05)                                     | .08 (.05)                                          | .10 (.04)*                                   | -.04 (.04)                            | .00 (.04)                                      |
| <b>Model Fit Indices</b>                                  |                                                 |                                              |                                                |                                                    |                                              |                                       |                                                |
| RMSEA                                                     | .026                                            | .066                                         | .055                                           | .026                                               | .032                                         | .048                                  | .031                                           |
| CFI                                                       | .995                                            | .980                                         | .989                                           | .998                                               | .996                                         | .989                                  | .995                                           |
| SRMR                                                      | .013                                            | .037                                         | .024                                           | .013                                               | .015                                         | .021                                  | .018                                           |
| <b>Invariance Test by Sex</b>                             |                                                 |                                              |                                                |                                                    |                                              |                                       |                                                |
| Constrained Model $\chi^2$ (DF)                           | 36.40 (15)                                      | 61.77 (15)                                   | 44.04 (15)                                     | 27.68 (15)                                         | 28.57 (15)                                   | 51.14 (15)                            | 38.01 (15)                                     |
| Unconstrained Model $\chi^2$ (DF)                         | 21.04 (10)                                      | 54.41 (10)                                   | 36.25 (10)                                     | 18.59 (10)                                         | 22.92 (10)                                   | 40.45 (10)                            | 31.06 (10)                                     |
| $\Delta\chi^2$                                            | 15.36, $p = .009$                               | 7.36, $p = .195$                             | 7.80, $p = .168$                               | 9.08, $p = .106$                                   | 5.65, $p = .341$                             | 10.69, $p = .058$                     | 6.95, $p = .224$                               |

**Note:** These analyses entail only the 2877 adolescents with no missing data. MH = Mental health.

\* $p < .05$ , \*\* $p < .01$ , \*\*\* $p < .001$ .

**Table S3.**

Parameter estimates obtained from random intercept cross-lagged panel models examining prospective associations between individual sport participation and mental health indices.

|                                                           | <u>Depressive<br/>Symptoms</u><br><i>B (SE)</i> | <u>Anxiety<br/>Symptoms</u><br><i>B (SE)</i> | <u>Emotional<br/>symptoms</u><br><i>B (SE)</i> | <u>Hyperactivity<br/>Symptoms</u><br><i>B (SE)</i> | <u>Conduct<br/>Problems</u><br><i>B (SE)</i> | <u>Peer Problems</u><br><i>B (SE)</i> | <u>Prosocial<br/>Behavior</u><br><i>B (SE)</i> |
|-----------------------------------------------------------|-------------------------------------------------|----------------------------------------------|------------------------------------------------|----------------------------------------------------|----------------------------------------------|---------------------------------------|------------------------------------------------|
| <b>Between-Person Effects</b>                             |                                                 |                                              |                                                |                                                    |                                              |                                       |                                                |
| (BP) Ind. Sport ↔ MH Index                                | -.35 (.13)**                                    | -.04 (.01)**                                 | -.18 (.05)***                                  | -.10 (.06)                                         | -.07 (.03)*                                  | -.04 (.04)                            | .05 (.05)                                      |
| <b>Prospective Within-Person Effects</b>                  |                                                 |                                              |                                                |                                                    |                                              |                                       |                                                |
| (AR1) Ind. Sport → Ind. Sport                             | .11 (.04)**                                     | .11 (.04)**                                  | .11 (.04)**                                    | .11 (.04)**                                        | .11 (.04)**                                  | .11 (.04)**                           | .11 (.04)**                                    |
| (AR2) MH Index → MH Index                                 | .19 (.04)***                                    | .48 (.04)***                                 | .50 (.03)***                                   | .34 (.03)***                                       | .24 (.05)***                                 | .27 (.04)***                          | .26 (.03)***                                   |
| (CL1) Ind. Sport → MH Index                               | .17 (.12)                                       | -.01 (.00)                                   | -.03 (.03)                                     | -.04 (.04)                                         | .01 (.01)                                    | -.01 (.03)                            | .01 (.03)                                      |
| (CL2) MH Index → Ind. Sport                               | -.01 (.01)                                      | -.09 (.05)                                   | -.03 (.01)*                                    | -.03 (.02)                                         | -.02 (.03)                                   | -.04 (.02)                            | -.01 (.02)                                     |
| <b>Contemporaneous Within-Person Covariance Estimates</b> |                                                 |                                              |                                                |                                                    |                                              |                                       |                                                |
| (CV1) Ind. Sport ↔ MH Index                               | .10 (.15)                                       | .01 (.02)                                    | .02 (.06)                                      | -.07 (.06)                                         | -.06 (.04)                                   | -.03 (.04)                            | .05 (.05)                                      |
| (CV2) Ind. Sport ↔ MH Index                               | -.20 (.17)                                      | -.02 (.02)                                   | -.05 (.06)                                     | -.02 (.06)                                         | -.03 (.04)                                   | -.08 (.04)                            | -.01 (.03)                                     |
| (CV3) Ind. Sport ↔ MH Index                               | -.41 (.19)*                                     | -.02 (.01)                                   | -.06 (.05)                                     | .00 (.05)                                          | -.05 (.03)                                   | .00 (.04)                             | .04 (.05)                                      |
| <b>Model Fit Indices</b>                                  |                                                 |                                              |                                                |                                                    |                                              |                                       |                                                |
| RMSEA                                                     | .027                                            | .052                                         | .033                                           | .001                                               | .016                                         | .031                                  | .008                                           |
| CFI                                                       | .991                                            | .983                                         | .994                                           | .999                                               | .999                                         | .993                                  | .999                                           |
| SRMR                                                      | .016                                            | .034                                         | .018                                           | .007                                               | .011                                         | .017                                  | .014                                           |
| <b>Invariance Test by Sex</b>                             |                                                 |                                              |                                                |                                                    |                                              |                                       |                                                |
| Constrained Model $\chi^2$ (DF)                           | 33.83 (15)                                      | 45.07 (15)                                   | 26.27 (15)                                     | 9.66 (15)                                          | 15.66 (15)                                   | 32.09 (15)                            | 22.95 (15)                                     |
| Unconstrained Model $\chi^2$ (DF)                         | 18.84 (10)                                      | 38.34 (10)                                   | 19.36 (10)                                     | 7.45 (10)                                          | 13.64 (10)                                   | 23.51 (10)                            | 18.04 (10)                                     |
| $\Delta\chi^2$                                            | 14.99, $p = .014$                               | 6.73, $p = .242$                             | 6.91, $p = .227$                               | 2.21, $p = .820$                                   | 2.02, $p = .846$                             | 8.58, $p = .127$                      | 4.91, $p = .427$                               |

**Note:** These analyses entail only the 2877 adolescents with no missing data. Ind. Sport = Hours of individual sport participation. MH = Mental health.

\* $p < .05$ , \*\* $p < .01$ , \*\*\* $p < .001$ .

**Table S4.**

Unconstrained random intercept cross-lagged panel model estimating prospective associations between sport participation and depressive symptoms stratified by sex.

|                                                           | <b>Team Sport Participation</b> |                      | <b>Individual Sport Participation</b> |                      |
|-----------------------------------------------------------|---------------------------------|----------------------|---------------------------------------|----------------------|
|                                                           | <b>Boys</b>                     | <b>Girls</b>         | <b>Boys</b>                           | <b>Girls</b>         |
|                                                           | <b><i>B (SE)</i></b>            | <b><i>B (SE)</i></b> | <b><i>B (SE)</i></b>                  | <b><i>B (SE)</i></b> |
| <b>Between-Person Effects</b>                             |                                 |                      |                                       |                      |
| (BP) Sport ↔ Depression                                   | -.82 (.24)***                   | -.20 (.22)           | -.56 (.16)***                         | -.11 (.20)           |
| <b>Prospective Within-Person Effects</b>                  |                                 |                      |                                       |                      |
| (AR1) Sport → Sport                                       | .04 (.06)                       | .18 (.04)***         | .14 (.05)**                           | .07 (.05)            |
| (AR2) Depression → Depression                             | .07 (.06)                       | .25 (.04)***         | .05 (.06)                             | .24 (.05)***         |
| (CL1) Sport → Depression                                  | -.10 (.16)                      | -.34 (.14)*          | .43 (.16)**                           | -.07 (.17)           |
| (CL2) Depression → Sport                                  | .00 (.01)                       | -.02 (.01)           | .00 (.01)                             | -.02 (.01)**         |
| <b>Contemporaneous Within-Person Covariance Estimates</b> |                                 |                      |                                       |                      |
| (CV1) Sport ↔ Depression                                  | -.20 (.19)                      | -.40 (.23)           | .23 (.18)                             | -.06 (.24)           |
| (CV2) Sport ↔ Depression                                  | .45 (.41)                       | -.46 (.31)           | .39 (.23)                             | -.74 (.24)**         |
| (CV3) Sport ↔ Depression                                  | .21 (.33)                       | -.28 (.25)           | .48 (.29)                             | -.42 (.24)           |
| <b>Model Fit Indices</b>                                  |                                 |                      |                                       |                      |
| RMSEA                                                     |                                 | .029                 |                                       | .026                 |
| CFI                                                       |                                 | .994                 |                                       | .992                 |
| SRMR                                                      |                                 | .017                 |                                       | .018                 |

**Note:** These analyses entail only the 2877 adolescents with no missing data.

\* $p < .05$ , \*\* $p < .01$ , \*\*\* $p < .001$ .
